# Supplementary material for: Oxytocin signaling is necessary for synaptic maturation of adult-born neurons
Source: PubMed Central journal article supplement — Genes Dev. 2022 Nov-Dec;36(21-24):1100–18. doi: 10.1101/gad.349930.122 (PMC9851403; doi:10.1101/gad.349930.122), 2022

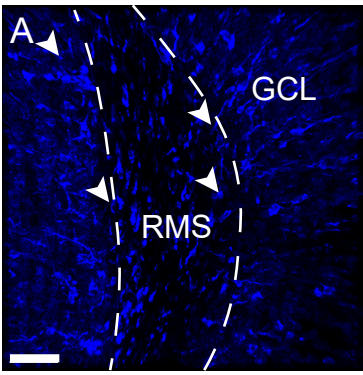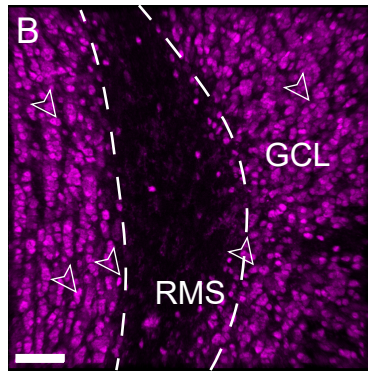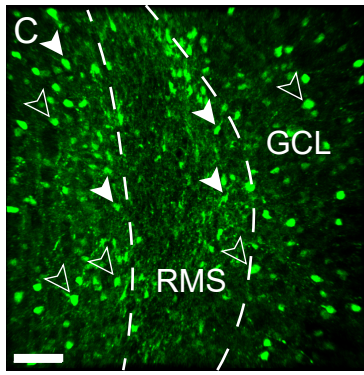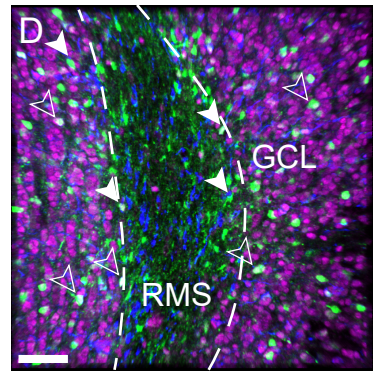

Doublecortin

NeuN

Oxtr-EGFP

Merge

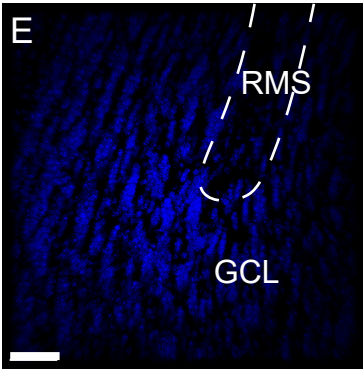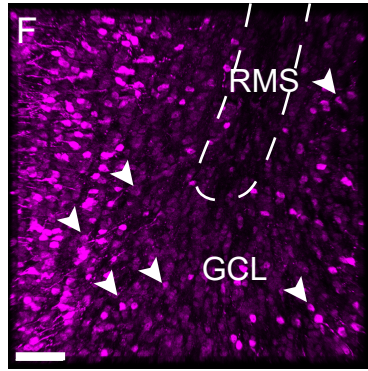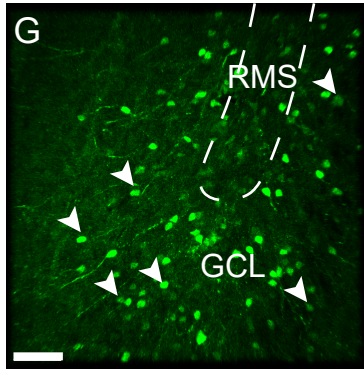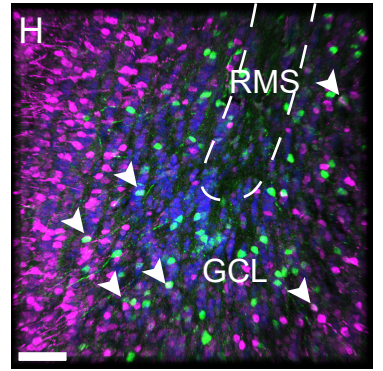

Hoechst

Calretinin

Oxtr-EGFP

Merge

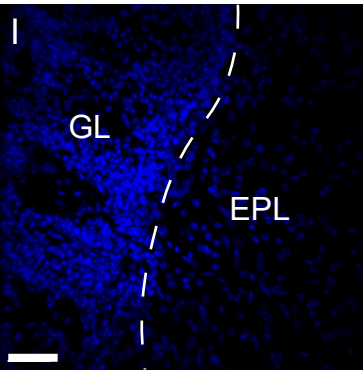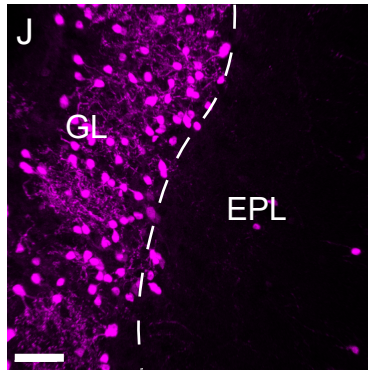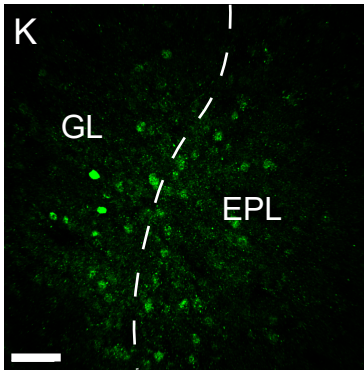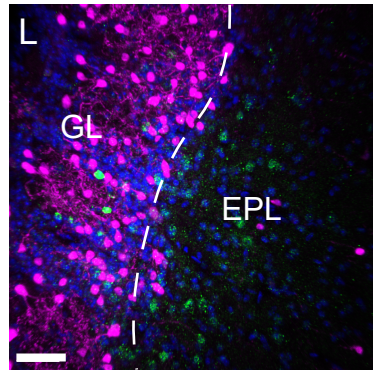

Hoechst

Calbindin

Oxtr-EGFP

Merge

M

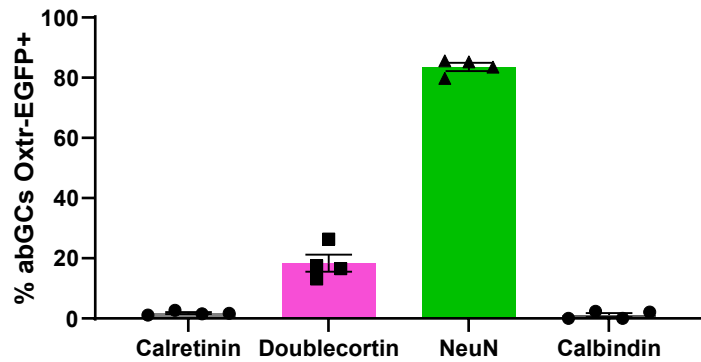

Supplement: supp_gad.349930.122_Supplemental_Fig_S1.pdf [file supp_gad.349930.122_Supplemental_Fig_S1.pdf]
