# Supplementary material for: Oxytocin signaling is necessary for synaptic maturation of adult-born neurons
Source: PubMed Central journal article supplement — Genes Dev. 2022 Nov-Dec;36(21-24):1100–18. doi: 10.1101/gad.349930.122 (PMC9851403; doi:10.1101/gad.349930.122), 2022

A

## Habituation

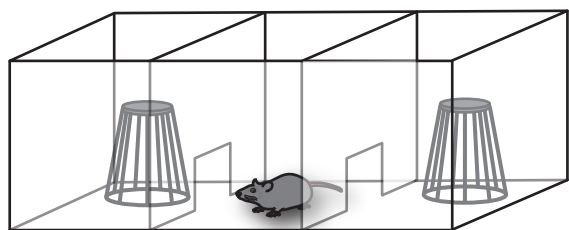

○ *Oxtr<sup>fl/fl</sup>*  
● *Dlx5/6-Cre, Oxtr<sup>fl/fl</sup>*

B

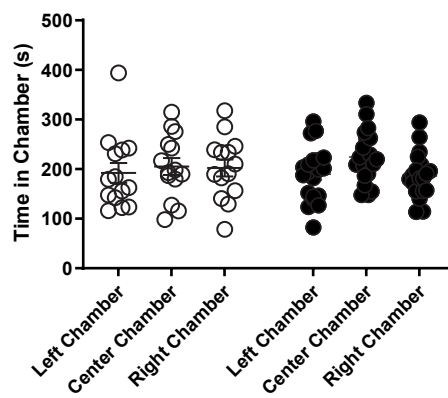

C

## Cup vs. Mouse

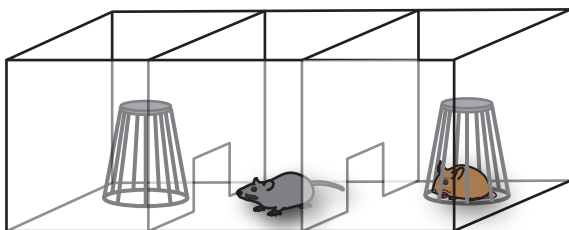

D

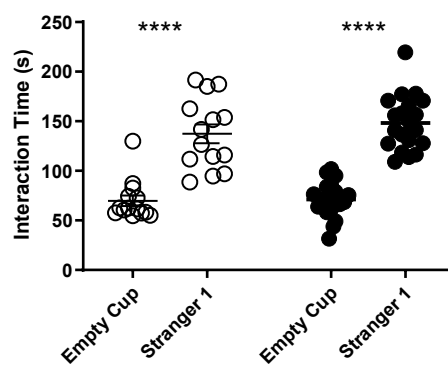

E

## Stranger vs. Friend

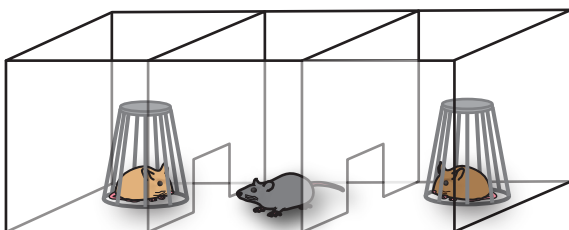

F

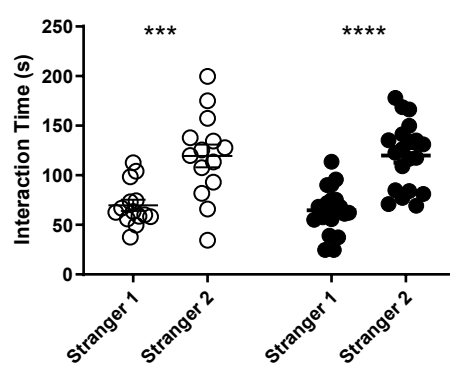

G

## Reciprocal Interaction

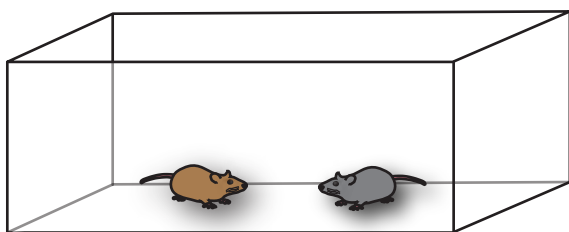

H

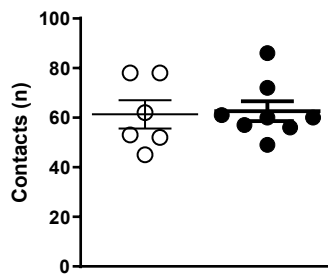

I

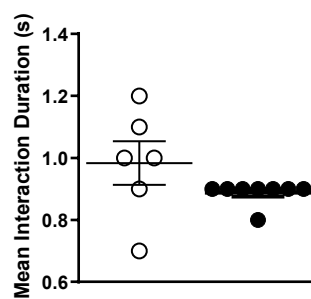

Supplement: supp_gad.349930.122_Supplemental_Fig_S3.pdf [file supp_gad.349930.122_Supplemental_Fig_S3.pdf]
