# Supplementary figures and images for: Oxytocin signaling is necessary for synaptic maturation of adult-born neurons
Source: PubMed Central journal article supplement — Genes Dev. 2022 Nov-Dec;36(21-24):1100–18. doi: 10.1101/gad.349930.122 (PMC9851403; doi:10.1101/gad.349930.122), 2022

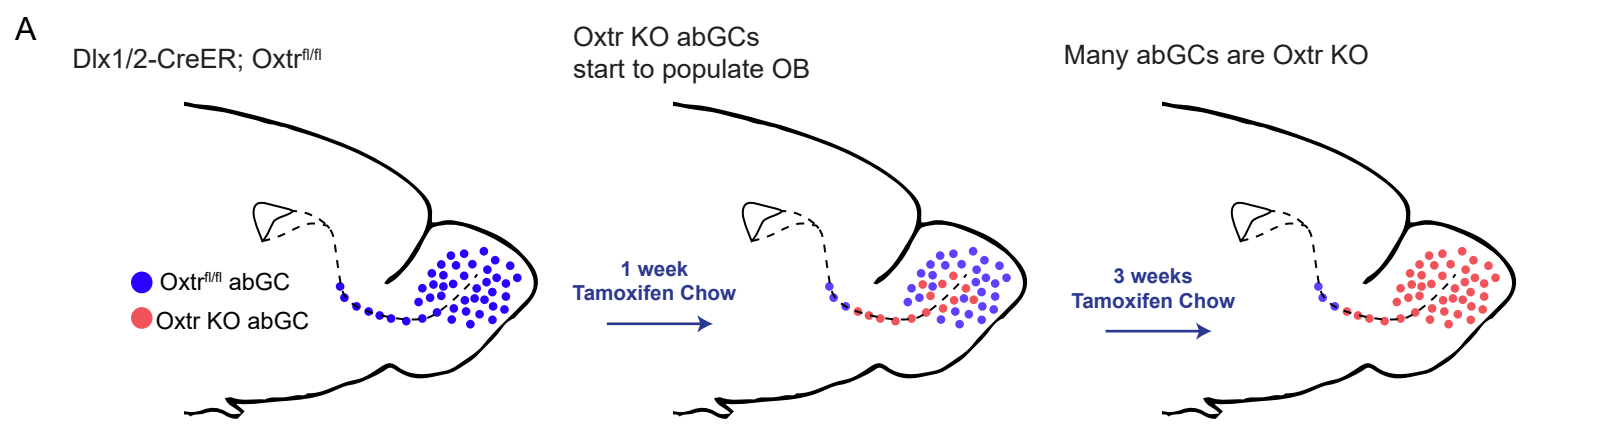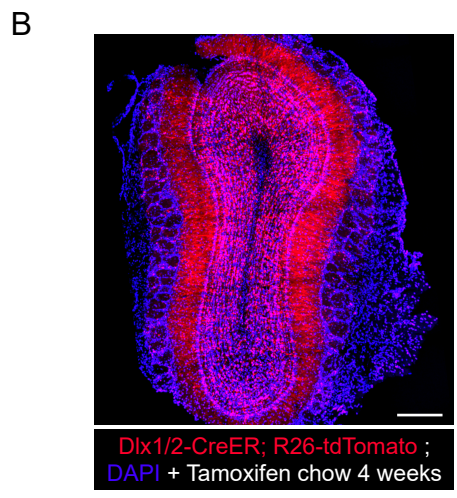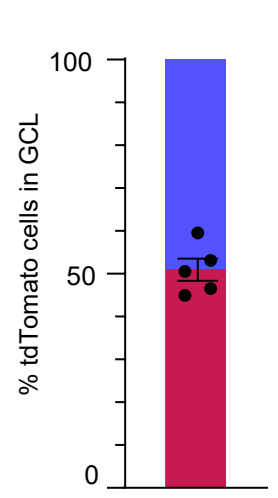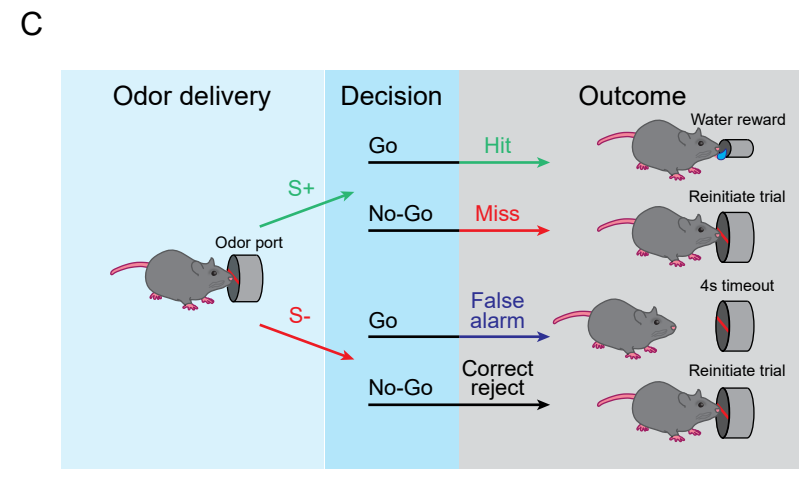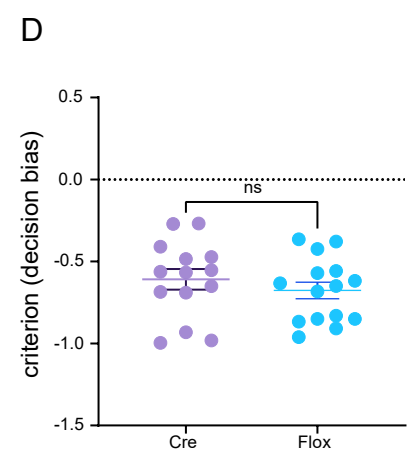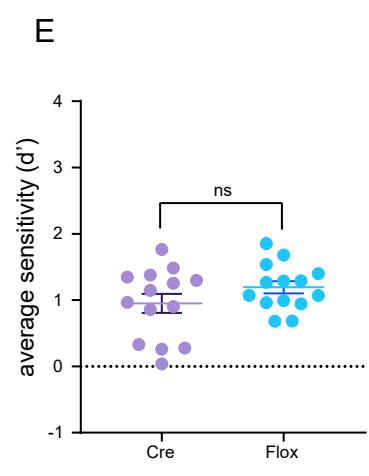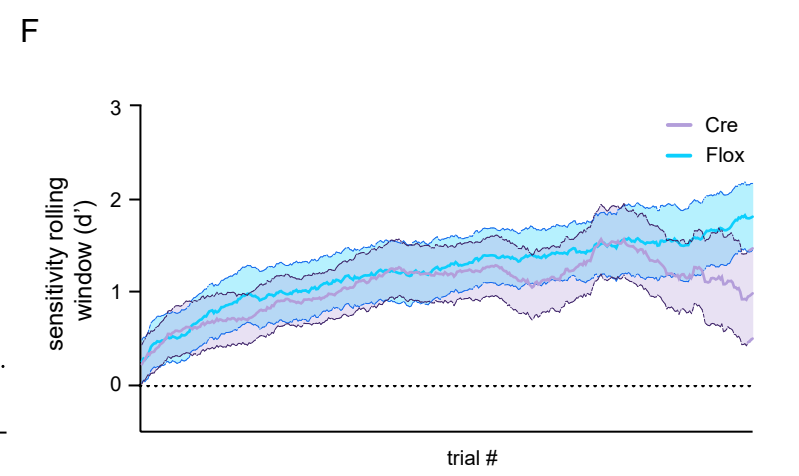

Supplement: supp_gad.349930.122_Supplemental_Fig_S2.pdf [file supp_gad.349930.122_Supplemental_Fig_S2.pdf]

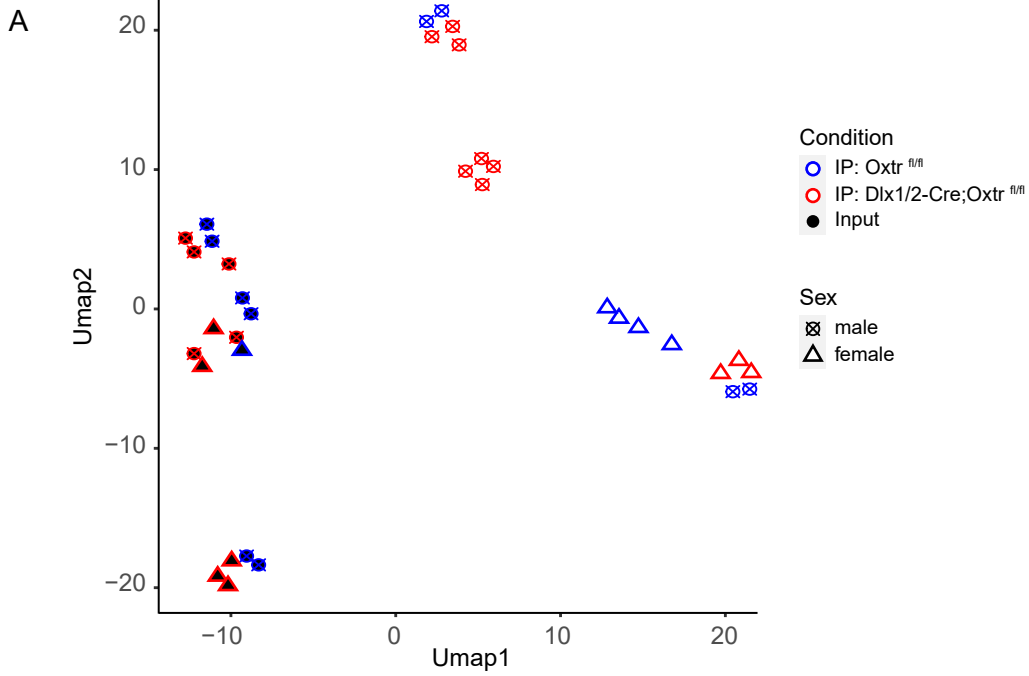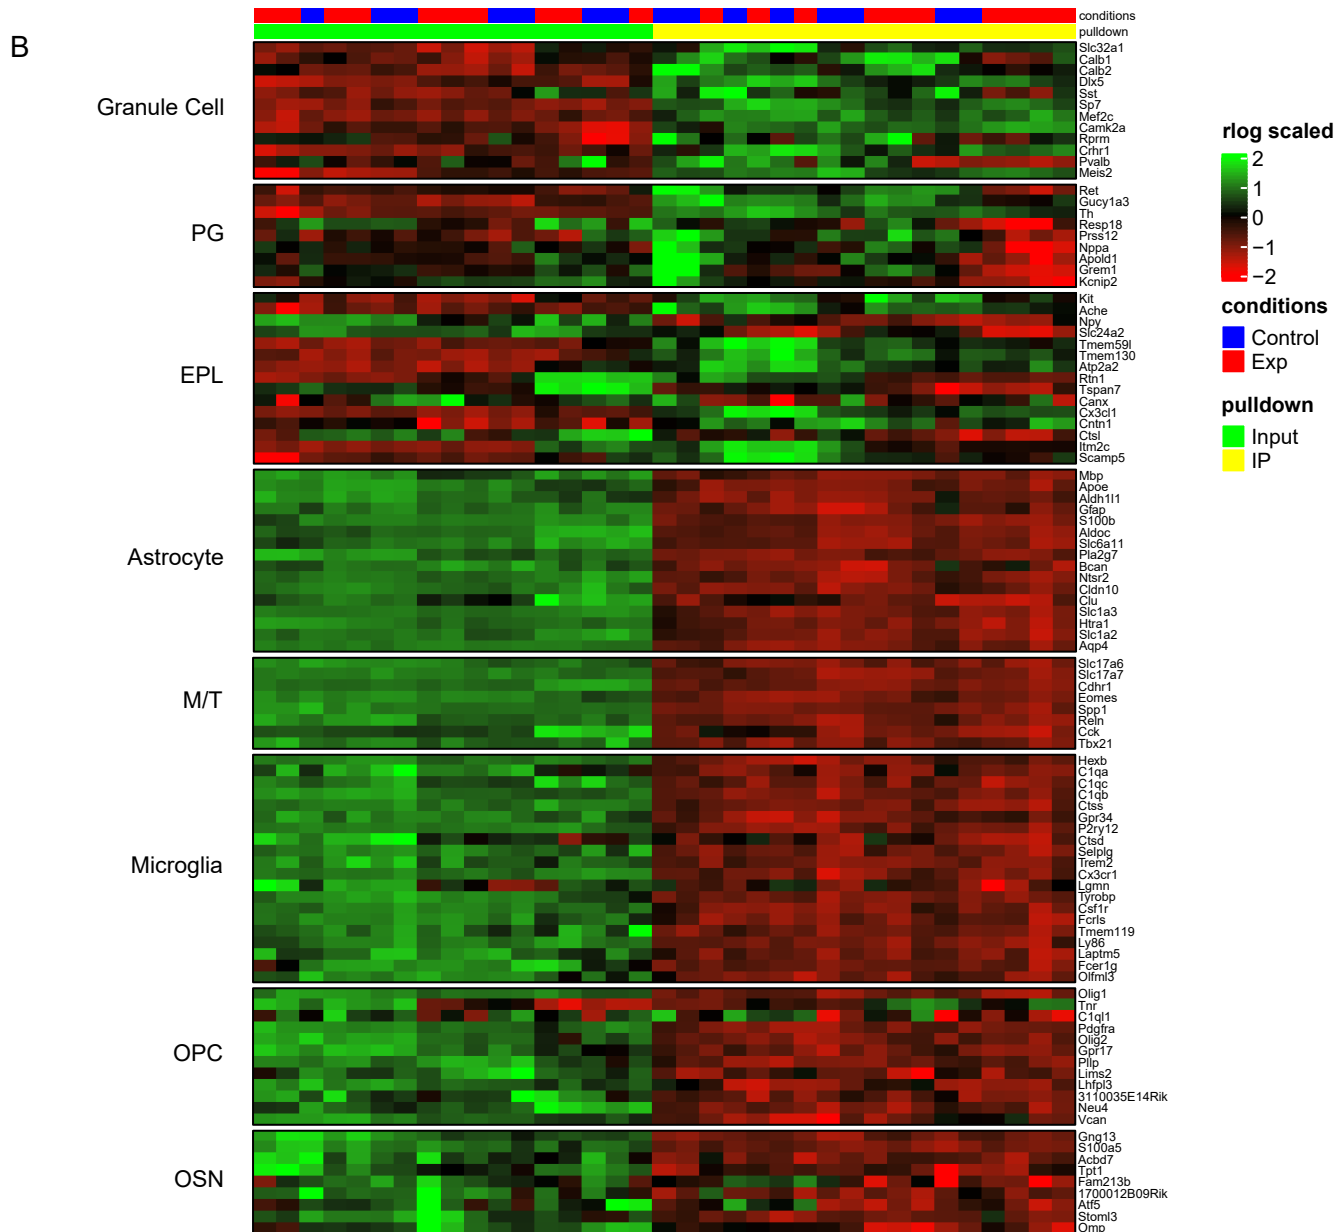

Supplement: supp_gad.349930.122_Supplemental_Fig_S4.pdf [file supp_gad.349930.122_Supplemental_Fig_S4.pdf]
